# Supplementary material
Source: Royal Society of Chemistry journal article supplement (doi:10.1039/d6tc01011c)
Supplement: d6tc01011c1.pdf [file d6tc01011c1.pdf]

## Supporting Information for

# Mn<sup>2+</sup> Mediated Electrodeposition of FeCoNi Films with Enhanced Magnetic Properties

Zi-Ao Gao,<sup>ab</sup> Wei Li,<sup>\*ad</sup> Zhi-Hong Chen,<sup>cd</sup> Xing Liu,<sup>a</sup> Feng Wang,<sup>ad</sup> Ya-Ting Xu,<sup>ab</sup>  
Yan He,<sup>b</sup> Yi-Fan Chang,<sup>b</sup> Yuan-Yuan Hu,<sup>b</sup> Xin-Yang Zhou,<sup>b</sup> Zhen-Ni Wang,<sup>b</sup> Xu Yao<sup>b</sup>  
and Jian-Guo Guan,<sup>\*ad</sup>

*a. State Key Laboratory of Advanced Technology for Materials Synthesis and Processing, Wuhan University of Technology, Wuhan 430070, China. E-mail:wellee@whut.edu.cn*

*b. School of Materials Science and Engineering, Wuhan University of Technology, Wuhan 430070, China. E-mail:guanjg@whut.edu.cn*

*c. School of Science, Wuhan University of Technology, Wuhan 430070, China.*

*d. Wuhan Xindian Technology Co., Ltd., Wuhan 430083, China.*

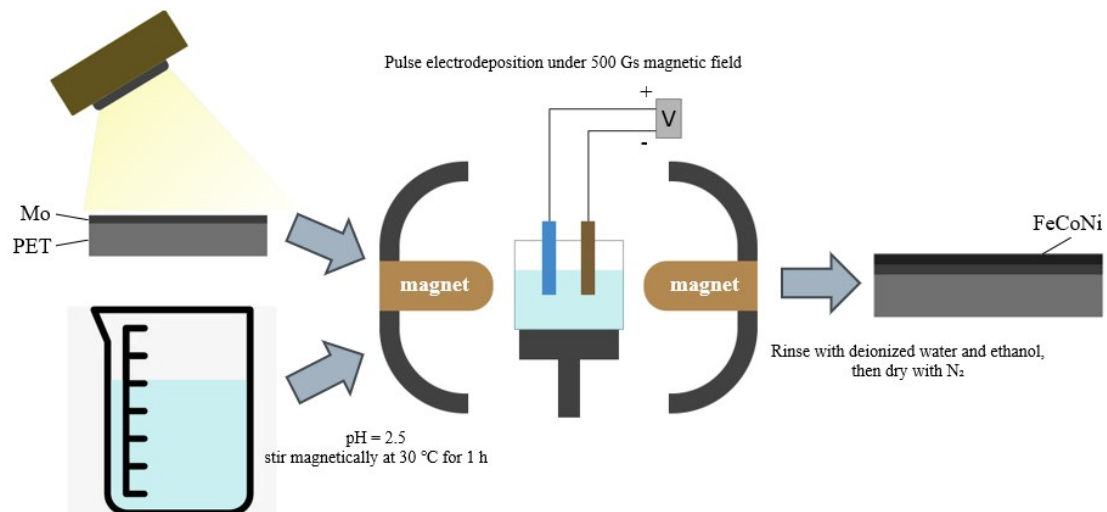

Fig. S1 Schematic illustration of the preparation process of FeCoNi soft magnetic films by pulse electrodeposition under a 500 Gs magnetic field, including electrolyte preparation, substrate assembly, deposition, and post-treatment.

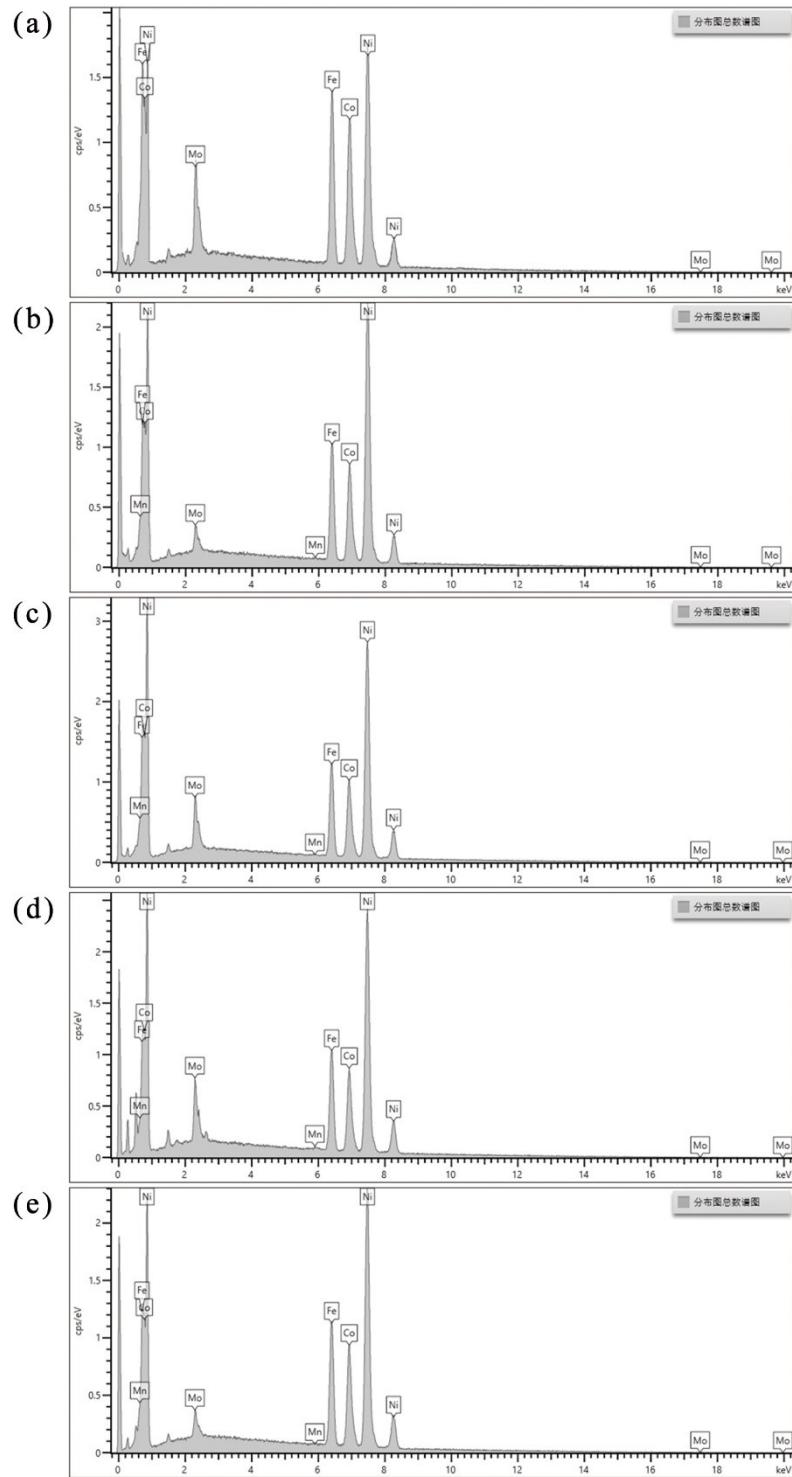

Fig. S2 EDS spectra of FeCoNi films electrodeposited with different Mn<sup>2+</sup> concentrations: (a) Mn0, (b) Mn2, (c) Mn4, (d) Mn6, and (e) Mn8.
